# Supplementary material for: Basal ganglia lesions may be a risk factor for characteristic features of a glaucomatous optic disc: population-based cohort study in Japan
Source: HighWire-hosted journal article supplement (doi:10.1136/bmjophth-2022-001077), 2023-03-01
Supplement: bmjophth-2022-001077supp001_data_supplement.pdf [file bmjophth-2022-001077supp001_data_supplement.pdf]

**Supplemental Table 1.** Age- and sex- specific proportion and cup-to-disc ratio (CDR)

class in this study.

CD1;  $0 \leq \text{VCDR} < 0.3$ , CD2;  $0.3 \leq \text{VCDR} < 0.6$ , CD3;  $0.6 \leq \text{VCDR} < 0.7$ , CD4;  $0.7 \leq$

$\text{VCDR} < 0.9$ , CD5;  $0.9 \leq \text{VCDR}$

|           | Number of right eye in each cup-to-disc ratio (CDR) class (%) |               |               |               |               |               |               |               |               |               |
|-----------|---------------------------------------------------------------|---------------|---------------|---------------|---------------|---------------|---------------|---------------|---------------|---------------|
|           | Male                                                          |               |               |               |               | Female        |               |               |               |               |
| Age group | 40-49                                                         | 50-59         | 60-69         | $\geq 70$     | all ages      | 40-49         | 50-59         | 60-69         | $\geq 70$     | all ages      |
| CD1       | 120<br>(45.8)                                                 | 128<br>(39.0) | 134<br>(47.7) | 103<br>(38.6) | 485<br>(42.6) | 152<br>(51.8) | 125<br>(45.6) | 121<br>(43.7) | 113<br>(43.6) | 511<br>(46.0) |
| CD2       | 129<br>(49.2)                                                 | 184<br>(56.2) | 129<br>(45.9) | 123<br>(46.0) | 565<br>(49.6) | 135<br>(46.1) | 135<br>(49.3) | 124<br>(44.8) | 116<br>(44.8) | 510<br>(45.9) |
| CD3       | 11<br>(4.2)                                                   | 12<br>(3.7)   | 13<br>(4.6)   | 25<br>(9.4)   | 61<br>(5.4)   | 5<br>(1.7)    | 12<br>(4.4)   | 20<br>(7.2)   | 16<br>(6.2)   | 53<br>(4.8)   |
| CD4       | 2<br>(0.8)                                                    | 4<br>(1.2)    | 5<br>(1.8)    | 15<br>(5.6)   | 26<br>(2.3)   | 1<br>(0.3)    | 2<br>(0.7)    | 11<br>(4.0)   | 14<br>(5.4)   | 28<br>(2.5)   |
| CD5       | 0<br>(0)                                                      | 0<br>(0)      | 0<br>(0)      | 1<br>(0.4)    | 1<br>(0.1)    | 0<br>(0)      | 0<br>(0)      | 1<br>(0.4)    | 0<br>(0)      | 1<br>(0.1)    |

**Supplemental Table 2.** The correlation between lesions other than basal ganglia and VCDR.

| Brain infarct lesions   | <i>F</i> value | <i>P</i> value |
|-------------------------|----------------|----------------|
| Thalamus                | 0.88           | 0.349          |
| Cerebellar white matter | 0.30           | 0.584          |
| Cerebellar gray matter  | 0.34           | 0.560          |
| Paralateral ventricle   | 0.38           | 0.539          |
| Cerebral white matter   | 2.60           | 0.107          |
| Cerebral gray matter    | 0.0            | 0.992          |
| Mesencephalon           | -              | -              |
| Pons                    | 2.00           | 0.158          |

**Supplemental Table 3.** Age- and sex- specific proportion and grades of basal ganglia lesions in this study participants with head MRI (n = 2,239).

Cochran-Mantel-Haenszel statistic

|           | Number of basal ganglia lesion (%) |               |               |               |                 |               |               |               |               |                 |
|-----------|------------------------------------|---------------|---------------|---------------|-----------------|---------------|---------------|---------------|---------------|-----------------|
|           | Male                               |               |               |               |                 | Female        |               |               |               |                 |
| Age group | 40-49                              | 50-59         | 60-69         | ≥70           | all ages        | 40-49         | 50-59         | 60-69         | ≥70           | all ages        |
| Grade 0   | 257<br>(99.6)                      | 314<br>(96.9) | 252<br>(91.0) | 203<br>(75.8) | 1,026<br>(91.0) | 291<br>(99.7) | 267<br>(97.8) | 272<br>(98.2) | 240<br>(88.9) | 1,070<br>(96.2) |
| Grade I   | 1<br>(0.4)                         | 10<br>(3.1)   | 10<br>(3.6)   | 40<br>(14.9)  | 61<br>(5.4)     | 1<br>(0.3)    | 6<br>(2.2)    | 3<br>(1.1)    | 23<br>(8.5)   | 33<br>(3.0)     |
| Grade II  | 0<br>(0)                           | 0<br>(0)      | 15<br>(5.4)   | 25<br>(9.3)   | 40<br>(3.6)     | 0<br>(0)      | 0<br>(0)      | 2<br>(0.7)    | 7<br>(2.6)    | 9<br>(0.8)      |
|           | p < 0.0001                         |               |               |               |                 | p < 0.0001    |               |               |               |                 |

**Supplemental Table 4.** The relationship between vertical cup-to-disc ratio and adjusted variables in general linear mixed model analysis after adjusted for age, sex, optic disc area, systolic blood pressure, diastolic blood pressure, body mass index, central corneal thickness, and previous cataract surgery.

| Adjusted variables        | <i>F</i> value | <i>P</i> value | $\beta$ (SE)     |
|---------------------------|----------------|----------------|------------------|
| Body mass index           | 7.36           | 0.0068         | -0.0034 (0.0013) |
| Central corneal thickness | 5.88           | 0.0155         | -0.2815 (0.1161) |

The parameter estimates for VCDR were -0.0034 per 1kg/m<sup>2</sup> (Body mass index) and -0.2815 per 1mm (Central corneal thickness).
